# Supplementary material
Source: Springer Nature journal article supplement (https://www.springermedizin.de/resource/supplementary/12884_2010_334_MOESM2_ESM.pdf/9457468)
Supplement: MOESM2 [file 9457468]

1612 potentially relevant studies were retrieved

1569 papers were excluded  
by reviewing the  
title and /or the abstract

44 full text papers  
were retrieved

20 papers were excluded

24 papers were included  
in the review

16 study did not meet the  
inclusion criteria

2 papers were conference  
proceedings

In 2 studies the data were  
not extractable
